# Supplementary material
Source: HighWire-hosted journal article supplement (https://molpharm.aspetjournals.org/highwire/filestream/84363/field_highwire_adjunct_files/1/117804_Table_S1.xlsx)
Supplement: 117804_Table_S1.xlsx [file 117804_Table_S1.xlsx]

## Sheet: Sheet1
TABLE S1
									Two-tailed Student's t-test P values
Gene Symbol	UMSCC25	UMSCC8	JHU011	HN12	Cal27	HN6	Mean Rank		vs Nono	vs Aldoa	vs Rpl11	vs Cpne1	vs Actb	vs Ldha	vs Arhgdia	vs Hnrnpd	vs Gapdh	vs Pgk1
MTOR	4	5	1	1	3	4	3		0.0028354	0.000481769	0.000595691	0.00126022	0.000699959	1.09291e-06	3.25324e-08	1.26018e-05	3.24071e-09	4.99867e-09
ERBB3	1	1	14	3	77	1	16.1667		0.00457943	0.000844986	0.000997545	0.00191879	0.00103424	2.69711e-06	1.35945e-07	2.27754e-05	2.31303e-08	1.97491e-08
CDK11B	22	80	45	39	8	12	34.3333		0.00730605	0.00136343	0.00157288	0.00288228	0.00150264	3.92795e-06	1.79812e-07	3.32357e-05	2.44446e-08	2.38979e-08
PRKAA1	32	14	79	102	5	3	39.1667		0.0094209	0.00190302	0.00212377	0.00362907	0.00186935	7.83554e-06	5.63476e-07	5.0191e-05	1.13251e-07	7.39735e-08
BMPR1A	59	118	55	48	16	22	53		0.0131012	0.00264332	0.0029114	0.00483907	0.0024328	9.34199e-06	5.72978e-07	6.31793e-05	9.06179e-08	6.96239e-08
CHEK1	63	176	11	57	12	5	54		0.0179961	0.00432429	0.00449972	0.00658991	0.00330093	3.45734e-05	4.868e-06	0.000133298	1.39998e-06	6.18953e-07
FYN	45	32	128	38	119	43	67.5		0.0207052	0.00449255	0.00476631	0.00730977	0.00357986	1.91862e-05	1.48498e-06	0.000107373	2.56265e-07	1.68306e-07
PKN2	195	53	137	11	14	2	68.6667		0.0312753	0.00860895	0.00852448	0.0111156	0.00546128	0.000106772	2.13489e-05	0.000298534	6.6564e-06	2.64144e-06
EPHA4	166	17	13	32	4	231	77.1667		0.0472094	0.0149449	0.0142355	0.0168045	0.00823727	0.000300531	8.26092e-05	0.000623411	2.80759e-05	1.05081e-05
SMG1	214	16	140	26	23	47	77.6667		0.0398342	0.0113386	0.0110614	0.0139303	0.00676687	0.000147963	3.06988e-05	0.000391227	9.14321e-06	3.6568e-06
VRK1	97	20	190	13	42	110	78.6667		0.0351658	0.00914035	0.00911747	0.0121479	0.00586347	7.97208e-05	1.21876e-05	0.000268255	3.06635e-06	1.37725e-06
ADRBK2	24	232	100	29	84	8	79.5		0.0425953	0.0123469	0.0119774	0.0148745	0.00721521	0.000170562	3.68138e-05	0.000434047	1.10307e-05	4.3783e-06
ETNK2	70	25	75	113	185	10	79.6667		0.0345992	0.00877627	0.00880446	0.0118981	0.00572799	6.77234e-05	9.34603e-06	0.000245337	2.19712e-06	1.03727e-06
BUB1B	8	12	9	147	31	272	79.8333		0.0575621	0.0198238	0.0185383	0.0207647	0.0102378	0.000538077	0.00017546	0.000948953	6.29732e-05	2.32647e-05
CSNK1G3	52	73	186	51		63	85		0.0554866	0.0160272	0.016253	0.0216985	0.0113876	0.000160616	2.0328e-05	0.000611263	4.75941e-06	2.69177e-06
MUSK	60	188	139	24	106	50	94.5		0.0499422	0.0131058	0.0128819	0.0166371	0.00783654	9.69547e-05	1.287e-05	0.000343911	2.61986e-06	1.30553e-06
CDK1	21	335	130	54	13	23	96		0.0976178	0.0387965	0.035184	0.0359537	0.0178087	0.00158884	0.000634521	0.0022455	0.000225115	8.6175e-05
PRKAA2	7	157	116	159	97	69	100.833		0.0568483	0.0148714	0.0145576	0.0186516	0.00869495	9.81956e-05	1.17413e-05	0.000366595	2.11363e-06	1.13114e-06
STK3	240	10	4	312	28	20	102.333		0.124069	0.0535417	0.0479916	0.0469804	0.0235645	0.00284482	0.00127396	0.00358272	0.00046071	0.000181416
PKMYT1	235	50		17	193	26	104.2		0.116661	0.0449267	0.0421609	0.0463107	0.0243208	0.00136499	0.000410502	0.00256887	0.000136271	5.75726e-05
MAPKAPK5	11	86	267	217	15	41	106.167		0.104573	0.0390946	0.0355669	0.0370974	0.0179327	0.00116035	0.00039287	0.00186149	0.000120788	4.70713e-05
KSR1	150	99	68	9	211	103	106.667		0.0727215	0.0209234	0.0199491	0.0239535	0.0111527	0.000199155	3.23123e-05	0.00058444	6.71536e-06	3.13856e-06
MAP4K2	169	98	236	36	17	87	107.167		0.0830409	0.0261643	0.0244777	0.0279028	0.0131141	0.000374442	8.18714e-05	0.000869252	2.00472e-05	8.43625e-06
PAK7	101	128	141	121	38	114	107.167		0.0579575	0.0138201	0.0137813	0.0184877	0.00847835	4.98721e-05	3.17536e-06	0.000269951	3.24983e-07	2.76911e-07
AURKB	81	96	135	16	314	6	108		0.111282	0.0424714	0.0384951	0.0396777	0.0192147	0.0013452	0.000470575	0.00208765	0.000145224	5.67587e-05
PRKDC	102	498	24	6	7	21	109.667		0.217949	0.121859	0.108038	0.0964883	0.0529357	0.0158967	0.00992543	0.0151358	0.00428368	0.00195266
MAPK6	234	214	8	33	9	199	116.167		0.129764	0.0501695	0.0452139	0.0459671	0.0220958	0.00154368	0.00052888	0.00239343	0.000152774	6.08086e-05
SIK2	286	120	103	144	32	13	116.333		0.117124	0.0419937	0.0382268	0.0402952	0.0190742	0.000939186	0.000269811	0.00169256	7.10168e-05	2.87547e-05
TGFBR1	135	127	2	258	125	55	117		0.10833	0.0363167	0.0333964	0.0363991	0.017018	0.000599462	0.000142786	0.00125951	3.38414e-05	1.42449e-05
HCK	157	23	69	263		80	118.4		0.146795	0.0568343	0.0529068	0.0571564	0.0295464	0.00150373	0.000407979	0.00296644	0.000116319	5.17879e-05
DAPK1	30	193	64	122	221	84	119		0.103262	0.0323855	0.0300958	0.0338941	0.0156466	0.000381161	7.17196e-05	0.000958157	1.46336e-05	6.65219e-06
TESK1	90	21	98	184	69	255	119.5		0.113316	0.037979	0.0348744	0.0379076	0.0176597	0.000604313	0.000140142	0.00128741	3.20733e-05	1.36744e-05
MAP2K4	15	9	99	334	235	30	120.333		0.172474	0.0775182	0.0687668	0.0653378	0.032518	0.0042067	0.00188209	0.00513587	0.00061317	0.000250241
FASTK	6	3	396	62	228	33	121.333		0.208051	0.104595	0.0923542	0.084358	0.0436556	0.00869886	0.00462124	0.00920923	0.00167324	0.00071656
MYO3B	193	48	358	23	92	24	123		0.176933	0.0788345	0.0698978	0.0665066	0.0329114	0.00404246	0.00176101	0.00502336	0.000555673	0.000227036
YSK4	196	146	157	73	157	28	126.167		0.112288	0.033668	0.0314063	0.0359049	0.0162952	0.000278246	3.91893e-05	0.000841643	6.24188e-06	3.27333e-06
ARAF	89	143	25	189	96	222	127.333		0.123317	0.0393633	0.0362709	0.0400647	0.0183107	0.000436896	7.7715e-05	0.0011123	1.4231e-05	6.74913e-06
DBF4	328	142	18	171	10	97	127.667		0.174523	0.0732927	0.0651381	0.0632319	0.0305826	0.00281999	0.00107068	0.00389901	0.00030238	0.000123322
CDK6	27	177	35	340	123	75	129.5		0.18098	0.0764897	0.0678876	0.0656336	0.0317291	0.00296492	0.00112778	0.00407631	0.000314891	0.000128942
TYK2	386	6	21	10	152	210	130.833		0.232944	0.116462	0.102514	0.0932756	0.0476983	0.00889284	0.00454587	0.00957295	0.00152362	0.000655562
ALPK3	145	81	265	59	210	31	131.833		0.1576	0.0579223	0.0521038	0.0534353	0.0248846	0.00117315	0.000311936	0.00215509	6.9671e-05	2.9648e-05
TRPM7	88	265	97	149	22	173	132.333		0.150356	0.0526997	0.0476981	0.0500018	0.0230481	0.00084614	0.000193872	0.0017461	3.9542e-05	1.74539e-05
NUAK2	51	115	54	8	322	245	132.5		0.201187	0.0890595	0.0786837	0.0745329	0.0364014	0.00407008	0.00166949	0.00522047	0.000478184	0.000197905
RPS6KA4	339	257	5	20	37	140	133		0.223624	0.10648	0.0937465	0.0865039	0.0432957	0.00656135	0.00306986	0.00754985	0.000954797	0.000403186
MAP2K3	55	29	257	101		229	134.2		0.210066	0.0898441	0.0818163	0.0830234	0.0429397	0.00310237	0.000977362	0.00521033	0.0002688	0.000120718
SRPK3	138	89	29	310	34	209	134.833		0.18997	0.078244	0.0694215	0.0675359	0.0321965	0.00255009	0.000883512	0.00374216	0.000224778	9.32131e-05
SBK1	35	26	274	14	75	387	135.167		0.259269	0.134418	0.118147	0.106138	0.0548857	0.0115127	0.00613259	0.0119378	0.00207293	0.000911906
VRK2	92		33	183	26	344	135.6		0.251497	0.122781	0.110367	0.1058	0.0566002	0.00768555	0.00335052	0.00989954	0.00109958	0.000488765
MARK3	413	85	207	87	20	11	137.167		0.260908	0.133513	0.117263	0.105596	0.0541734	0.0106891	0.00554078	0.0112802	0.00181375	0.000793449
PRKCA	119	34	230	99	252	96	138.333		0.173308	0.0628549	0.056433	0.0578591	0.0266202	0.00107501	0.000254084	0.00212281	5.00895e-05	2.22599e-05
TXK	249	18	144	192	192	44	139.833		0.186515	0.0706575	0.0630543	0.0632961	0.0293423	0.00145651	0.000386476	0.002615	8.06352e-05	3.50065e-05
EEF2K	134	220	162	160	115	48	139.833		0.151604	0.0471719	0.0433088	0.047744	0.0213121	0.000349998	4.3427e-05	0.00108975	5.51109e-06	3.21289e-06
CDK16	20	74	315	104	21	306	140		0.248872	0.119653	0.105037	0.0961823	0.0479313	0.00721304	0.00332309	0.00830013	0.000980298	0.000418595
TSSK3	9		121	292	241	39	140.4		0.260728	0.12467	0.112014	0.107901	0.0570615	0.00676154	0.00272716	0.00918518	0.000828313	0.000370556
RAF1	16	439	3	375	1	9	140.5		0.359313	0.22272	0.197426	0.17132	0.0974531	0.0377092	0.0252508	0.0336484	0.0104077	0.00524535
CDK7	260	134	92	129	99		142.8		0.209468	0.0791647	0.0730494	0.0780051	0.0389382	0.00123399	0.000213493	0.00311971	3.76966e-05	2.10006e-05
PHKG1	57	205	89	244	58	207	143.333		0.193031	0.0715403	0.0638808	0.0645385	0.0296163	0.0012454	0.000294856	0.00241525	5.56477e-05	2.50376e-05
ALPK2	133	247	15	181	57	236	144.833		0.212081	0.0838943	0.0743351	0.072913	0.0339215	0.00196472	0.000557995	0.00329281	0.000116315	5.04738e-05
ADRBK1	50	137	173	19	294	201	145.667		0.224334	0.0923273	0.0814913	0.0785932	0.0369182	0.0025836	0.000811668	0.00398847	0.000178931	7.66874e-05
PRKCZ	2	33	219	118	271	237	146.667		0.245154	0.107803	0.0946865	0.088969	0.0425894	0.00406198	0.00149223	0.00552137	0.000360808	0.000153448
MAPK4	56	394	95	108		81	146.8		0.311718	0.162053	0.14464	0.134635	0.0727495	0.0121059	0.00567538	0.0144211	0.00182344	0.000836218
STK35	162	404	27	165	87	42	147.833		0.288875	0.144106	0.126078	0.113618	0.0569542	0.00945994	0.0044839	0.010504	0.00128768	0.000561842
WNK1	68	119	231	31	243	195	147.833		0.217594	0.0842594	0.0746947	0.073728	0.033965	0.00168484	0.000431894	0.00302889	8.22713e-05	3.67187e-05
RIOK2	298	126	74	172	162	56	148		0.216412	0.0831382	0.0737536	0.073034	0.0335699	0.00159165	0.000396752	0.00292158	7.41416e-05	3.33239e-05
ADCK5	213	30	313	200	112	25	148.833		0.256744	0.114402	0.100317	0.0936617	0.0449046	0.00445452	0.00165844	0.00595994	0.00039811	0.000170131
EIF2AK3	453	27	41	75	244	53	148.833		0.341195	0.192213	0.168705	0.147714	0.0785486	0.0211006	0.0121953	0.0203243	0.00413638	0.00193009
PRKAR2A	305	269	167	60	27	72	150		0.26665	0.121105	0.106053	0.0982779	0.0473576	0.00507649	0.00195708	0.00658957	0.000476939	0.000204415
BLK	46	185	304	46		171	150.4		0.288698	0.134448	0.120532	0.116493	0.0604245	0.0056574	0.00195366	0.00848284	0.000502567	0.000231737
IKBKE	236	51		105		211	150.75		0.311761	0.146832	0.135642	0.138474	0.0776248	0.00529803	0.0013528	0.0103511	0.000328218	0.000177671
EPHA5	140	87	229	230	36	183	150.833		0.219445	0.0815719	0.0725064	0.072632	0.0329778	0.00124179	0.000263749	0.00254365	4.32966e-05	2.05209e-05
MYO3A	5	244	63	78	93	428	151.833		0.337951	0.184031	0.16109	0.141753	0.073755	0.0170967	0.0092731	0.0171135	0.00291575	0.00133226
RPS6KB1	25	75		180	156	325	152.2		0.306063	0.147387	0.131726	0.125526	0.0656432	0.00716667	0.00267936	0.0100653	0.000715296	0.000329076
CSNK2A2	19	297	36	252	251	59	152.333		0.294277	0.141835	0.123896	0.112456	0.0552584	0.00760802	0.00328441	0.00899732	0.000853603	0.000370445
MAPK14	80	386	6	229	64	158	153.833		0.318762	0.162007	0.141436	0.126349	0.0634001	0.0108903	0.00518018	0.0119361	0.0014376	0.000635449
ILK	79	277	181	41	178	174	155		0.246844	0.0966316	0.0852402	0.0832185	0.038034	0.00177719	0.000424344	0.00328973	7.22781e-05	3.34608e-05
PNCK	14	4	296	2	285	345	157.667		0.384317	0.220286	0.193052	0.16781	0.0892919	0.0244861	0.0141222	0.0233794	0.00457628	0.0021673
CAMK4	42	497	113	201	24	71	158		0.402794	0.239183	0.21021	0.181834	0.0988805	0.0309606	0.0188331	0.0286335	0.0064571	0.00314203
CDC2L2	338	110	19	47	174	260	158		0.320329	0.155755	0.135725	0.122414	0.0599263	0.00813184	0.0034405	0.00965329	0.000846995	0.000371376
ETNK1	342	71	221	53	206	60	158.833		0.314053	0.148225	0.129158	0.117468	0.0567471	0.00662979	0.00260257	0.00831536	0.000602005	0.000263334
STK32C	99	117	324	25	136	258	159.833		0.309897	0.142376	0.124078	0.113734	0.0543003	0.00549306	0.00199866	0.00728273	0.000434119	0.00019038
PACSIN1	379	95	48	66	357	17	160.333		0.393578	0.224591	0.196596	0.170778	0.090358	0.0239853	0.0136036	0.0230682	0.00427362	0.00201892
ADCK4	23	171	260	76	132	303	160.833		0.310595	0.140987	0.122853	0.112975	0.0536203	0.00503824	0.00175784	0.00687884	0.00036757	0.00016189
MAP3K6	279	69	180	309	50	85	162		0.324918	0.151926	0.132215	0.12033	0.0576604	0.00619426	0.00230904	0.00801946	0.000501849	0.00022108
PHKG2	73	100		194		281	162		0.379392	0.191029	0.174321	0.171489	0.0965486	0.00845198	0.00244832	0.0146629	0.000587604	0.000314959
MASTL	251	68	81	52	191	333	162.667		0.332491	0.157703	0.137171	0.124237	0.0598152	0.00684023	0.00262728	0.00864424	0.000580858	0.000256242
ULK4	103	417	105	208	25	125	163.833		0.374102	0.196524	0.171048	0.150663	0.0758454	0.0138506	0.00664099	0.0148355	0.00174206	0.000787284
CAMK2B	337	344	96	35	45	126	163.833		0.379888	0.202512	0.176359	0.154841	0.078536	0.0153049	0.00755668	0.0160596	0.00203494	0.000925513
MAP4K5	18	46	290	245	324	61	164		0.374985	0.19705	0.171497	0.151032	0.0760266	0.0138827	0.00665395	0.0148695	0.00174304	0.000787939
DYRK1B	310	198	51	306	40	79	164		0.35633	0.178089	0.154811	0.138026	0.0678332	0.00983608	0.00423268	0.0113878	0.00101234	0.000450456
WNK3	152	354	7	248	95	128	164		0.351372	0.173148	0.150497	0.134692	0.0657788	0.00891806	0.00371459	0.0105761	0.000865534	0.000384105
ACVRL1	228	54	258	64	341	40	164.167		0.36186	0.183265	0.159331	0.141554	0.0699759	0.0107791	0.00477235	0.0122185	0.00116696	0.00052105
ITK	105	11	47	231	224	367	164.167		0.371424	0.193001	0.1679	0.148232	0.0741848	0.0128596	0.00601641	0.0140079	0.00154144	0.000693893
PRKD2	129	218	28	293	66	252	164.333		0.330496	0.152068	0.132238	0.120762	0.0573146	0.00549961	0.0019172	0.00744425	0.000389343	0.000172945
TIE1	48	289	85	114	147	304	164.5		0.333	0.154081	0.133961	0.122103	0.0580617	0.00572109	0.00202175	0.00766198	0.000414121	0.000183875
CSNK1E	241	15	87	5	175	465	164.667		0.434105	0.259069	0.227359	0.195939	0.106136	0.0327671	0.0196762	0.0303196	0.0064417	0.00314919
TRIM33	115	339	78	70	120	268	165		0.341874	0.161496	0.140326	0.127044	0.0608622	0.00661966	0.00246013	0.00852634	0.000521028	0.000231168
RIPK3	65	316	57	358	121	74	165.167		0.379816	0.199315	0.173381	0.152631	0.0766612	0.013767	0.00653284	0.0148198	0.00168357	0.000761415
MAP2K6	172	70		203	165	221	166.2		0.321976	0.132189	0.119059	0.119729	0.0588299	0.00190056	0.000277554	0.00485365	3.3776e-05	2.22232e-05
CHUK	84		50	150	60	487	166.2		0.475546	0.298422	0.266088	0.234533	0.136463	0.0454701	0.0281691	0.0433973	0.0103713	0.0053572
ADCK2	382	2	177	88	342	18	168.167		0.439654	0.256774	0.224634	0.193725	0.103041	0.028626	0.0163788	0.0271298	0.00498701	0.00239864
ADCK3	217	298	34	360	67	36	168.667		0.412266	0.225114	0.19592	0.170705	0.08716	0.0181303	0.00913499	0.0186172	0.00243304	0.0011229
PRKRA	3	113	252	405	138	108	169.833		0.415575	0.225635	0.196223	0.171037	0.0869211	0.017448	0.00863114	0.0181057	0.00224248	0.00103285
NRBP1	78	320	208	146	240	29	170.167		0.368746	0.175224	0.151875	0.136759	0.0651734	0.00679783	0.00242841	0.00889778	0.000478573	0.000215306
KDR	29	332	65	246	290	66	171.333		0.414325	0.220138	0.191119	0.167166	0.0837969	0.0150118	0.00702192	0.0161437	0.001715	0.000783735
CDK14		44	143	278	289	106	172		0.412854	0.209774	0.185469	0.171183	0.0890058	0.0100498	0.00357542	0.0139409	0.00079219	0.00038376
NLK	283	116	472	63	47	52	172.167		0.477388	0.289707	0.25413	0.217881	0.118367	0.0374407	0.0225149	0.0343493	0.00711985	0.00352886
BMP2K	10	174	178	151	345	177	172.5		0.382719	0.183046	0.158472	0.142196	0.067706	0.00705542	0.00249818	0.00923772	0.000479476	0.000217064
RYK	120	94	102	162	198	359	172.5		0.37252	0.172534	0.149414	0.135356	0.063607	0.00556352	0.00178566	0.00782352	0.000317923	0.000145279
STK25	161	180	276	195	35	189	172.667		0.344664	0.144389	0.125488	0.117556	0.0532769	0.00257267	0.000567382	0.00472108	7.65117e-05	3.81352e-05
RET	39	35	235	130	219	391	174.833		0.442209	0.240967	0.209187	0.181673	0.0918798	0.0178856	0.00863385	0.0187094	0.00212156	0.000982219
PRKACG	303	159	175	226	140	51	175.667		0.373922	0.164376	0.142301	0.130774	0.0599439	0.00363453	0.000917313	0.00600464	0.000132403	6.39795e-05
CDK2	312	49	256	207	218	16	176.333		0.425636	0.217513	0.188149	0.165479	0.080733	0.0112678	0.0046003	0.013194	0.000961078	0.000438173
MAPK11	86	55		250	382	111	176.8		0.481334	0.274493	0.242414	0.21615	0.117625	0.0234184	0.0112211	0.0260408	0.00303844	0.001487
BCKDK	17	19	434	112	398	83	177.167		0.532752	0.342833	0.302663	0.258283	0.145899	0.0563935	0.0366814	0.0495986	0.0125821	0.00657632
CDKL5	186	364	31	325	130	34	178.333		0.475221	0.268211	0.233097	0.200836	0.103178	0.022858	0.0116375	0.0229602	0.00294827	0.001391
MAP3K12	61	13	335	7	369	285	178.333		0.513356	0.314801	0.275955	0.235694	0.128049	0.0407128	0.024353	0.0372149	0.0074187	0.00370703
TYRO3	247	182	213	55	189	185	178.5		0.370284	0.151345	0.131277	0.123476	0.0549576	0.00192382	0.000319684	0.00415454	3.25228e-05	1.84813e-05
CSNK1A1	34	501	16	81	101	340	178.833		0.552932	0.363465	0.321827	0.274525	0.157589	0.065417	0.0437651	0.056826	0.0155433	0.00830202
NEK8	12	31	350	374	307	7	180.167		0.541093	0.343877	0.302753	0.258014	0.143769	0.0521867	0.0329636	0.0463716	0.0107015	0.00552046
CAMK1	49	77	165	157	401	232	180.167		0.465641	0.250394	0.216711	0.188057	0.0936731	0.0161229	0.00724159	0.0175303	0.00160117	0.000741601
TNNI3K	98	83	39	442	301	119	180.333		0.510074	0.303957	0.26536	0.226889	0.120446	0.0334713	0.0188233	0.0315695	0.00526058	0.0025696
MAST3	262	112	179	135	122	274	180.667		0.393894	0.167923	0.145134	0.134231	0.0603386	0.00264168	0.000513025	0.00510855	5.74398e-05	3.07397e-05
PINK1	26	252	93	67	331	316	180.833		0.481976	0.267564	0.231998	0.200105	0.101413	0.0202626	0.00977386	0.0209863	0.00230521	0.00108058
DMPK	225	200	245	71	316	38	182.5		0.454786	0.228791	0.197228	0.173391	0.0831278	0.00971256	0.00352998	0.0121549	0.000635025	0.000294259
NTRK3	93	201	298	236	100	168	182.667		0.419108	0.187453	0.161551	0.146815	0.0669049	0.00381513	0.000884648	0.00650551	0.000111073	5.61646e-05
BRD4	95	350	168	212	126	148	183.167		0.437682	0.206324	0.177644	0.158825	0.0738524	0.00581027	0.00166387	0.00856488	0.000245065	0.000117458
PKN1	113	310	126	127		241	183.4		0.469723	0.234719	0.206479	0.190092	0.096629	0.00795262	0.00217614	0.0127662	0.000357272	0.000188325
DSTYK	358	123	246	86	247	46	184.333		0.485233	0.25797	0.222698	0.19316	0.0949892	0.0145869	0.00610902	0.0164845	0.00122622	0.000570137
STK16	180	125	250	305	88	164	185.333		0.441017	0.20105	0.172935	0.155901	0.0712265	0.00428953	0.00101514	0.00714027	0.00012571	6.36896e-05
TTBK2	36	84	473	61		277	186.2		0.60282	0.400587	0.357488	0.310742	0.184447	0.0702823	0.0451319	0.0645737	0.0158533	0.00861538
CSNK1G2	40	343	32	448	113	142	186.333		0.570122	0.359652	0.315681	0.268226	0.147416	0.0500775	0.0305216	0.0449766	0.00915319	0.00468021
RIPK4	33	97	468	336	74	116	187.333		0.58091	0.370331	0.325472	0.276376	0.153005	0.0539571	0.0333895	0.0480724	0.0101768	0.00525307
AKT3	300	133	40	247	11	394	187.5		0.553727	0.33272	0.289986	0.246781	0.130463	0.0354807	0.0195308	0.033559	0.00510452	0.00250809
AURKA	44	212	38	347	109	376	187.667		0.551413	0.328899	0.286381	0.24383	0.128191	0.0336448	0.0182117	0.0321193	0.0046603	0.00227822
GCK	41	122		110		478	187.75		0.639775	0.441943	0.400229	0.356189	0.225806	0.0895049	0.0583357	0.0857399	0.022752	0.01296
SRC	75	249	80	215	338	180	189.5		0.502396	0.256177	0.220133	0.19196	0.0915345	0.0101631	0.00348551	0.0129821	0.000560039	0.000265503
STK33	170	414	198	21	135	203	190.167		0.543477	0.306798	0.265305	0.226923	0.114514	0.0222802	0.0103699	0.0232139	0.00220754	0.00104979
TSSK2	243	103	281	49		278	190.8		0.548499	0.302799	0.265474	0.236433	0.124134	0.0169033	0.00624328	0.021747	0.00121546	0.000615151
PDGFRB	87	495	61	344	48	115	191.667		0.623873	0.412588	0.36438	0.309027	0.175637	0.0701407	0.0456108	0.0609768	0.0146647	0.00784169
SGK3	440	107	132	107	43	330	193.167		0.601035	0.372357	0.325163	0.275358	0.147728	0.0440236	0.0250435	0.0406097	0.0065979	0.00331468
EPHB1	74	207	314	43	386	138	193.667		0.580313	0.34004	0.294723	0.250413	0.128796	0.0290971	0.0144739	0.0289194	0.00322976	0.00156445
HUNK	411	79	194	18	436	27	194.167		0.646149	0.434067	0.384194	0.325765	0.187273	0.0785568	0.0520641	0.0676952	0.0170676	0.00927353
SRPK1	268	238	101	176	167	215	194.167		0.493149	0.218919	0.187353	0.16909	0.0751443	0.00277592	0.000413835	0.00592746	3.13031e-05	1.99176e-05
STK36	253	333	145	276	71	94	195.333		0.558165	0.299318	0.257099	0.220955	0.107118	0.0143687	0.00537225	0.0170522	0.000883889	0.000422468
IRAK3	164	379	23	345	170	92	195.5		0.600613	0.359439	0.312089	0.264388	0.137638	0.0338937	0.0175229	0.0328381	0.00403833	0.00198003
KHK	287	45		133		321	196.5		0.643137	0.403306	0.360984	0.324236	0.191361	0.0409326	0.0187191	0.0480608	0.00482512	0.00261869
ALK	76	140	332	205	226	205	197.333		0.550991	0.276713	0.236566	0.205818	0.0959481	0.00801329	0.00219905	0.0115657	0.000268946	0.000135722
CLK2	137	231	391	40	329	57	197.5		0.621548	0.379293	0.329915	0.278814	0.146814	0.0390127	0.0208489	0.0369916	0.00493769	0.00245147
PRKCI	218	385	201	111	202	68	197.5		0.580015	0.317348	0.272681	0.233169	0.113923	0.0165547	0.00642732	0.0190646	0.00107489	0.000515734
PRKACA	210	255	163	100	216	243	197.833		0.525662	0.238151	0.203239	0.18173	0.0807839	0.00301569	0.000435245	0.00643426	3.03446e-05	1.99578e-05
NTRK1	126	93	466	391	104	15	199.167		0.676389	0.455368	0.402589	0.340544	0.194861	0.0801896	0.0524281	0.0691547	0.0164272	0.00891819
MAP4K3	191	410	84	411	2	105	200.5		0.676617	0.448076	0.39467	0.333168	0.187281	0.0712114	0.0448505	0.0621964	0.0131422	0.00699932
SRPK2	202	131	240	218	204	208	200.5		0.535385	0.231977	0.197762	0.17891	0.0777017	0.00169208	0.000134196	0.0048769	4.96688e-06	5.08063e-06
ALPK1	116	401	131	441	86	32	201.167		0.682307	0.45336	0.399492	0.337191	0.189957	0.0729607	0.0461265	0.0635915	0.013552	0.0072401
LTK	13	59	460	96	245	339	202		0.690337	0.461519	0.407061	0.343582	0.194464	0.0762898	0.0486517	0.0662249	0.0144348	0.00775886
MAPK15	447	270	203	37	139	117	202.167		0.658727	0.408308	0.355254	0.299169	0.158238	0.0432328	0.0232001	0.0406264	0.00535759	0.00268767
MAPK9	266	311	43	28	333	233	202.333		0.649707	0.392446	0.34011	0.286671	0.148512	0.0353064	0.0176518	0.0344813	0.00372622	0.00183995
NRK	216	165	12	432	18	384	204.5		0.710865	0.480287	0.424165	0.357862	0.203903	0.0823719	0.0530836	0.0710792	0.0158278	0.00859229
OBSCN	118	436	17	170	242	247	205		0.680586	0.424509	0.369243	0.310332	0.164165	0.04484	0.0239156	0.0420985	0.00537612	0.00270781
MET	94	175	275	202	344	144	205.667		0.633926	0.339988	0.29025	0.24751	0.117516	0.0123557	0.00376715	0.0161986	0.000461445	0.000233269
STRADB		384	52	262	164	167	205.8		0.687815	0.423969	0.371902	0.321447	0.175724	0.0372968	0.0170469	0.0404531	0.00357701	0.00186012
LMTK2	318	373	72	139	275	64	206.833		0.686977	0.421073	0.364906	0.306417	0.159234	0.0385883	0.0192659	0.0374291	0.00392856	0.00195802
CAMKV	277	154		177	291	139	207.6		0.661939	0.36032	0.312774	0.276151	0.139831	0.0109765	0.00240107	0.0183849	0.000247503	0.000154133
PRKX	163	253	394	80	117	239	207.667		0.675529	0.393563	0.338462	0.284945	0.142207	0.0250411	0.0104494	0.0268997	0.00171817	0.000844821
FLT3	106	457	146	45	355	141	208.333		0.725862	0.478963	0.420312	0.353056	0.195312	0.06863	0.0411951	0.0606516	0.0107337	0.00566199
ULK3	355	178	77	403	142	98	208.833		0.708926	0.443504	0.385248	0.322919	0.170029	0.0449614	0.0233812	0.0425271	0.00495055	0.00249779
CDKL4	327	352	404	103	33	35	209		0.739487	0.498945	0.439783	0.369993	0.209028	0.0812277	0.0511137	0.0704104	0.0143139	0.00772768
CAMK2N1	58	155	182	433	353	73	209		0.723974	0.46995	0.410947	0.3447	0.187522	0.0603069	0.034625	0.0543083	0.00840274	0.00436174
PRKG1			224	320	83		209		0.760419	0.515272	0.468886	0.428479	0.275816	0.0609751	0.0251515	0.0785089	0.00615857	0.00380934
CSNK2A1	136	163	111	459		179	209.6		0.733633	0.477074	0.420729	0.361221	0.204171	0.057151	0.0302664	0.0565349	0.00729829	0.00388124
CDK12	167	183	138	275	183	319	210.833		0.666949	0.345489	0.293136	0.250566	0.115218	0.00766507	0.00159271	0.0124056	0.000128157	7.43817e-05
MAP3K11	151	153	191	168	296	308	211.167		0.671861	0.350749	0.297682	0.253983	0.117205	0.00822583	0.00178075	0.0129799	0.000148175	8.46889e-05
CDK9	69	221	82	125	445	328	211.667		0.744677	0.485688	0.424592	0.355588	0.193358	0.061934	0.0353121	0.055766	0.0083409	0.00434078
ROS1	176	225	185	152	423	112	212.167		0.714531	0.421222	0.361844	0.303263	0.151183	0.0261728	0.0106214	0.0282785	0.00162512	0.00080848
ACVR2A	265	363	83	116	234	213	212.333		0.709252	0.408983	0.350252	0.29408	0.144195	0.0213258	0.00784355	0.0244159	0.00107738	0.000539585
TGFBR2	244	114	268	185	41	422	212.333		0.735719	0.46134	0.400183	0.334582	0.175295	0.0447007	0.0226041	0.0426636	0.00449651	0.0022727
MAP3K7	331	254	37	458	160	37	212.833		0.768101	0.52159	0.459698	0.386097	0.218157	0.084719	0.0530121	0.0733206	0.0144074	0.00780589
BRSK2	311	58	225	315	188	186	213.833		0.718607	0.40985	0.350157	0.293976	0.142521	0.0186654	0.00629091	0.0224149	0.000776622	0.000395107
HIPK4	175	8		439		234	214		0.803935	0.575876	0.519973	0.456174	0.289254	0.115762	0.0730301	0.109932	0.0240739	0.0141239
TRIM28	114	443	293	72	176	188	214.333		0.755616	0.480454	0.417385	0.348506	0.184097	0.0494586	0.0255872	0.046499	0.00516966	0.00263543
MAP3K14	206	191	363	27	274	226	214.5		0.737869	0.441383	0.379421	0.317088	0.159014	0.0288735	0.011945	0.0306754	0.00182697	0.000914005
MAP3K2	31	228	58	389	168	413	214.5		0.777271	0.524255	0.461014	0.386461	0.216167	0.0799907	0.0487656	0.0697903	0.0125715	0.00674828
EPHB4	369	36	125	179	232	347	214.667		0.753778	0.472797	0.409621	0.341864	0.178274	0.0439011	0.0216427	0.042295	0.00409048	0.00206936
PLK2	223	342	71	225	310	118	214.833		0.736597	0.434576	0.372722	0.311681	0.15452	0.025272	0.00978834	0.0278728	0.00138606	0.000695959
PSKH1	239	76	280	115	255	331	216		0.743351	0.433724	0.37111	0.310298	0.152125	0.0222449	0.00797173	0.0255935	0.0010251	0.000520281
PASK	471	287	237	124	79	107	217.5		0.793409	0.525987	0.460115	0.384195	0.209882	0.0686444	0.0391079	0.0613738	0.00888523	0.0046739
MAPK1	83	82	338	91	448	267	218.167		0.804787	0.54409	0.477923	0.399718	0.222576	0.080376	0.0481131	0.0703478	0.0117771	0.00631409
DDR2	215	293	117	319	114	253	218.5		0.760398	0.435264	0.370781	0.309904	0.148867	0.0172834	0.00519949	0.0218472	0.000541077	0.000285782
ATM	231	441	127	83	29	400	218.5		0.81621	0.566901	0.501159	0.420732	0.241217	0.09968	0.0637837	0.0851668	0.0174818	0.00966891
PAK4	306	7	351	4		425	218.6		0.838756	0.615874	0.55476	0.477561	0.299383	0.147993	0.103563	0.128245	0.0361389	0.0216693
MOS	281	106	169	137		401	218.8		0.799402	0.516591	0.452941	0.386396	0.213658	0.0495318	0.0228121	0.052072	0.00433632	0.00232635
HIPK1	407	42	109	283	169	307	219.5		0.803601	0.523544	0.455768	0.379449	0.202836	0.0583558	0.0309209	0.0537851	0.00621781	0.00322012
PRKCB	142	275		363	30	291	220.2		0.818137	0.543647	0.478634	0.407697	0.230226	0.063342	0.0322564	0.0628887	0.00685524	0.00370865
TNK2	224	294	321	89	195	200	220.5		0.778435	0.444954	0.378366	0.315711	0.150684	0.0160353	0.00445346	0.0210659	0.00041633	0.000226145
EPHA3	54	203		223	327	296	220.6		0.807769	0.510127	0.445145	0.379662	0.205345	0.0382945	0.0151379	0.043678	0.00238185	0.00129662
CAMK1G	100	365	211	85	339	224	220.667		0.801831	0.501331	0.432512	0.359181	0.184205	0.0396788	0.0177597	0.0397836	0.00281941	0.00143369
ACVR1C	91	141	271	277	433	113	221		0.8139	0.526835	0.457607	0.380355	0.201345	0.0543294	0.0276766	0.0509155	0.00520229	0.00268219
EIF2AK4	194		46	272	215	380	221.4		0.823098	0.537991	0.471899	0.401611	0.223003	0.0533686	0.0248348	0.0554878	0.00467359	0.00252335
ERBB2	259	63	86	415	222	284	221.5		0.818889	0.531786	0.462092	0.384	0.203685	0.0556393	0.0284991	0.0519606	0.00537718	0.00277794
RIPK1	205		73	175	259	396	221.6		0.823408	0.53549	0.469231	0.399318	0.22069	0.0506484	0.0229246	0.053441	0.00416635	0.00225099
CDK5R1	282	148	56	210		416	222.4		0.839125	0.565737	0.498887	0.424353	0.241765	0.0708554	0.0372221	0.0689687	0.00810209	0.00442011
BMPR2	313	449	115	95	277	86	222.5		0.837241	0.564584	0.494558	0.412139	0.226805	0.076786	0.0440918	0.0679918	0.00981143	0.00522319
MYLK4	121	349	262	142	319	146	223.167		0.816753	0.495831	0.424708	0.352019	0.174818	0.0283024	0.0104447	0.0313638	0.00128372	0.000662894
PDGFRA	38	445	153	300	248	156	223.333		0.841243	0.561666	0.49061	0.408082	0.221765	0.0699772	0.0386253	0.0629459	0.0080291	0.00423199
NUAK1	307	321	192	141	94	287	223.667		0.819457	0.493186	0.421642	0.34942	0.172038	0.0255282	0.00884832	0.029256	0.00100733	0.000525649
AKT2	43	340	249	109	181	420	223.667		0.844602	0.565326	0.49401	0.410915	0.223735	0.0713417	0.0395719	0.0640065	0.00826903	0.00436702
CSNK1G1	158	272	124	269	186	349	226.333		0.842861	0.502073	0.427536	0.353543	0.171264	0.0210268	0.0062276	0.0260641	0.000577051	0.000314358
SCYL1	258	72	223	444		136	226.6		0.877988	0.60643	0.536316	0.455325	0.263357	0.0852508	0.0469442	0.0805524	0.0105763	0.00586327
MAK	174	43	407	68	440	228	226.667		0.882437	0.624707	0.553063	0.463325	0.267452	0.113228	0.0724835	0.0960176	0.0190092	0.0106557
MST1R	410	91	387	233	141	101	227.167		0.876737	0.595052	0.52074	0.432663	0.237259	0.0783325	0.0439243	0.0696212	0.00910763	0.00485737
MAP3K10	242	360	226	256	98	182	227.333		0.85464	0.514582	0.438633	0.36217	0.176476	0.0230137	0.00708388	0.0278277	0.000675788	0.000365791
ADCK1	67	263	205	303	449	82	228.167		0.886588	0.605986	0.530971	0.441262	0.243346	0.0827282	0.0470319	0.0730191	0.00990307	0.00531263
EGFR	490	161	149	224	68	280	228.667		0.89221	0.614162	0.538994	0.448274	0.248973	0.0878022	0.0508693	0.0768743	0.011017	0.00595027
SPEG	47	152	366	42	303	463	228.833		0.903262	0.651303	0.579101	0.486522	0.286264	0.130782	0.0867657	0.109659	0.0241234	0.0138313
STK32B	182	61	477	154	336	169	229.833		0.903848	0.628365	0.55259	0.459969	0.257805	0.0950658	0.0562893	0.0824427	0.012557	0.00684661
FGR	246	260	184	434	116	150	231.667		0.909959	0.594903	0.51419	0.423477	0.220195	0.0510587	0.0229007	0.0499378	0.00328583	0.00171756
IRAK2	412	230	94	274	287	95	232		0.915886	0.610583	0.530209	0.437451	0.232127	0.0621386	0.0304437	0.0581959	0.00493474	0.00259401
SNRK	365	475	164	44	85	265	233		0.936031	0.675243	0.599285	0.501883	0.292848	0.129038	0.0835329	0.108471	0.0215997	0.0123006
PDPK1	71	215	142	421	280	271	233.333		0.928813	0.621681	0.539882	0.445055	0.236313	0.0632946	0.0308759	0.0592511	0.00491375	0.00258996
AKT1	173	149	445	291	80	263	233.5		0.932178	0.633136	0.551941	0.455918	0.246111	0.0732801	0.0380894	0.0666416	0.00666581	0.00354278
EPHA2	200	290	151	243	263	261	234.667		0.929085	0.544312	0.458243	0.37581	0.174562	0.0109494	0.00156847	0.0188833	5.74777e-05	4.60226e-05
STK4	256	222	295	134	179	323	234.833		0.934353	0.56977	0.483333	0.395603	0.190078	0.0197204	0.00468977	0.0265159	0.000301625	0.000183287
PTK7	245	345	183	156	378	104	235.167		0.944669	0.621862	0.536901	0.440808	0.228431	0.0509222	0.021915	0.0504311	0.00286769	0.00151355
MAP3K5	96	236	386	167	52	474	235.167		0.954296	0.691699	0.614124	0.514065	0.300417	0.13296	0.085986	0.11158	0.0219129	0.0125157
JAK2	131	486	199	386	19	194	235.833		0.960703	0.702831	0.625662	0.524912	0.310322	0.143719	0.0951046	0.119891	0.0253233	0.0146542
TRIB1	491	108	161	34	207	414	235.833		0.961743	0.711115	0.635252	0.534819	0.321087	0.157482	0.107383	0.130605	0.030505	0.0179642
MERTK	208	403	465	158	108	78	236.667		0.966538	0.698425	0.618984	0.516974	0.299729	0.128146	0.0811512	0.107982	0.0196465	0.0111364
PAK6	104	129	454	77	217	439	236.667		0.967524	0.707846	0.629865	0.528067	0.311597	0.143157	0.0942179	0.119482	0.0246848	0.0142608
MAPK12	53	136	239	333	200	461	237		0.967802	0.684072	0.601924	0.499547	0.280759	0.103886	0.0606887	0.0897465	0.0125773	0.00691789
LCK	146	190	399	173	39	477	237.333		0.972867	0.709928	0.630964	0.528245	0.310055	0.139405	0.0906073	0.11662	0.0230364	0.013236
RPS6KA6	326	397	209	199	150	145	237.667		0.969957	0.638392	0.549923	0.450168	0.231282	0.0475118	0.0190844	0.0483814	0.00221326	0.00118183
DDR1	238	415	312	286	110	67	238		0.97584	0.676318	0.591111	0.487819	0.266418	0.0841669	0.0447108	0.0752926	0.0078031	0.00420309
ULK1	273	317	222	302	107	212	238.833		0.980974	0.620449	0.528363	0.430497	0.211006	0.0269108	0.0073715	0.0331	0.000523208	0.000306518
MAP2K1	472	60	255	228	229	190	239		0.985666	0.689611	0.604039	0.499006	0.275067	0.0914498	0.0499436	0.0807831	0.00905567	0.0049141
SCYL3	344	172	200	84	227	408	239.167		0.986586	0.673356	0.585276	0.480875	0.256617	0.0698026	0.0336448	0.0649735	0.0049802	0.00265938
RIPK2	349	433	112	65	334	143	239.333		0.989496	0.711904	0.629043	0.523359	0.299472	0.120387	0.0733261	0.102309	0.0161639	0.00905697
CDK19	284	217	353	331	182	70	239.5		0.989523	0.661858	0.571724	0.467954	0.243371	0.0547381	0.0232008	0.0540482	0.00283656	0.00151627
CDK8	219	283	26	313	368	230	239.833		0.993295	0.680058	0.591327	0.485754	0.259663	0.071283	0.0344726	0.0661678	0.00509596	0.00272618
Nono	179	109	393	56	408	298	240.5		1	0.71911	0.634833	0.52747	0.300628	0.118423	0.0711319	0.100941	0.0151431	0.00845997
ABL1	187	383	467	98	82	227	240.667		0.998518	0.727482	0.644344	0.536962	0.310402	0.130409	0.0812039	0.109959	0.0185294	0.010497
WNK2	316	396	107	206	55	364	240.667		0.998443	0.712573	0.626766	0.519071	0.291259	0.106185	0.060968	0.09186	0.0119167	0.00656702
ZAK	64	145	247	341	373	275	240.833		0.996641	0.68926	0.599433	0.49215	0.263315	0.0724624	0.0349606	0.0672018	0.00509969	0.00273445
EPHB2	296	381	20	90	400	259	241		0.995552	0.73029	0.646895	0.539062	0.311739	0.131143	0.0816686	0.110537	0.0185982	0.0105423
SRMS	190	237	382	143		256	241.6		0.988779	0.68681	0.598167	0.499548	0.272967	0.0515278	0.0179783	0.0589988	0.00192221	0.00114931
TEX14	380	314	66	280	171	242	242.167		0.982843	0.695447	0.603205	0.493943	0.261437	0.0663632	0.0301724	0.0630273	0.00396692	0.00213108
PKN3	77	47	485	298	153	393	242.167		0.986275	0.7613	0.68165	0.574081	0.347851	0.175555	0.120539	0.144761	0.0336498	0.0200831
TNK1	154	435	154	106	312	295	242.667		0.978741	0.716121	0.625927	0.515182	0.281507	0.0880845	0.0458269	0.078866	0.00741875	0.00402399
PDXK	204	37	349	123	434	310	242.833		0.978813	0.740778	0.654895	0.544278	0.312057	0.125932	0.076311	0.106769	0.016256	0.00914801
CSNK1D	387	307	70	266	62	368	243.333		0.973863	0.740867	0.653673	0.542133	0.30819	0.119334	0.0705192	0.101901	0.0142562	0.00796297
CDK10	159	351	442	12		254	243.6		0.974681	0.772395	0.693451	0.590017	0.365348	0.169377	0.110726	0.146635	0.0297946	0.0178924
STK11	340	368	62	240	44	409	243.833		0.970679	0.758372	0.673718	0.562355	0.329191	0.14538	0.0925432	0.121494	0.0216445	0.0124433
SIK3		138	156	500	349	77	244		0.972137	0.781925	0.704256	0.600983	0.377217	0.185612	0.12546	0.159202	0.0360637	0.0219966
TAOK3	347	353	243	242	61	218	244		0.963442	0.709518	0.614543	0.502116	0.264327	0.0638987	0.0278375	0.0616191	0.00336701	0.00182007
PAK3	366	452	147	119	51	329	244		0.969389	0.761335	0.676928	0.565491	0.332242	0.148943	0.0955837	0.124213	0.0227188	0.0131124
ATR	201	450	60	182	124	450	244.5		0.965813	0.771513	0.688241	0.576825	0.343753	0.162947	0.107776	0.134961	0.0272745	0.0159896
NEK3	207	223	189	381	231	238	244.833		0.949494	0.680343	0.578762	0.468308	0.229531	0.0273694	0.006595	0.0348968	0.000363589	0.000230518
GAK	405	24	67	221	442	312	245.167		0.960987	0.782512	0.700263	0.588801	0.35573	0.17729	0.120416	0.146096	0.0322459	0.0192025
CDC42BPB	230	309	228	209	128	369	245.5		0.944027	0.702489	0.601955	0.488222	0.246301	0.0404645	0.0129465	0.044941	0.00100553	0.000576281
PEAK1	320	485	195	253	56	166	245.833		0.951288	0.766586	0.678154	0.563198	0.323708	0.131493	0.0794572	0.111195	0.0164747	0.00931192
NTRK2	293	226	212	204	418	124	246.167		0.939631	0.72615	0.627615	0.511266	0.266964	0.0598087	0.0243633	0.0591543	0.00260474	0.00142495
LRRK1	220	380	114	273			246.75		0.944719	0.774559	0.69057	0.591205	0.361567	0.103409	0.0466556	0.109591	0.0076047	0.00472296
ZAP70	426	347	193	335	129	58	248		0.930682	0.783765	0.692937	0.574559	0.329315	0.131494	0.0782549	0.11141	0.015487	0.00874473
CDK15	252	92	233	376	254	282	248.167		0.916327	0.740589	0.638164	0.518025	0.26739	0.0535267	0.019726	0.055128	0.00178287	0.000997353
MKNK2	367	286	269	93	431	49	249.167		0.921897	0.800433	0.710577	0.591356	0.34483	0.148659	0.0923516	0.124312	0.0197907	0.0113651
KIAA1804	429	57	424	282	286	19	249.5		0.925601	0.82134	0.737501	0.62162	0.380835	0.198582	0.137444	0.162718	0.0375881	0.0227788
ROR2	229	169	91	317	415	276	249.5		0.908374	0.77446	0.675415	0.55261	0.299286	0.0863384	0.0414571	0.0788673	0.00549546	0.00301083
CDKL3	475	192	106	326	6	397	250.333		0.919698	0.83063	0.74724	0.631078	0.389759	0.208636	0.146355	0.170642	0.0411975	0.0252086
FLT4	198	471	188	214	288	152	251.833		0.885775	0.80124	0.700715	0.57385	0.314292	0.0965777	0.0479563	0.0866533	0.00656416	0.00362224
EPHB3	112	52	334	241	426	348	252.167		0.893289	0.825203	0.732152	0.608126	0.353562	0.149645	0.0913313	0.12529	0.0184439	0.0105797
COL4A3BP	299	378	10	388	356	88	253.167		0.890776	0.845224	0.756203	0.633805	0.381854	0.186919	0.124116	0.153568	0.030054	0.0178892
MAP3K1	72	481	160	128	292	389	253.667		0.885602	0.848386	0.758471	0.635026	0.381317	0.1842	0.121263	0.151482	0.0286816	0.0170127
TLK1	85	78	329	350	384	300	254.333		0.869845	0.840621	0.743682	0.615154	0.353181	0.140224	0.0817919	0.118562	0.0147788	0.00839788
MAP4K1	271	388	148	120	261	338	254.333		0.855446	0.819923	0.713879	0.581376	0.312784	0.0840604	0.0374342	0.0783664	0.0041522	0.00230927
ICK	435	291	214	290	143	155	254.667		0.854013	0.826465	0.721316	0.588573	0.319706	0.0917915	0.0428606	0.0838903	0.00512156	0.00284487
MAPK13	444	62	365	216		187	254.8		0.877911	0.859371	0.770618	0.6518	0.401747	0.179626	0.112189	0.155763	0.0255578	0.0153936
RPS6KA2	357	111	381	163	306	219	256.167		0.838894	0.843114	0.736673	0.601135	0.327956	0.0962521	0.0453302	0.0873904	0.00540142	0.00301221
LYN	294	90	411	198		289	256.4		0.851516	0.859709	0.762338	0.637184	0.375651	0.128523	0.0662657	0.118904	0.0104215	0.00614146
LMTK3	141	210	273	377	213	326	256.667		0.82186	0.835374	0.721769	0.582955	0.304449	0.0630147	0.022319	0.0642938	0.00168347	0.000981173
CDK3	124	467	90	425		178	256.8		0.871073	0.88756	0.80378	0.686861	0.440996	0.235579	0.163671	0.198811	0.0465178	0.0293028
CDC7	432	197	355	295	187	76	257		0.841006	0.863073	0.761957	0.627997	0.357259	0.134361	0.075043	0.114672	0.0121363	0.00686833
ATG7	345	299	215	69		358	257.2		0.843851	0.867462	0.769324	0.642802	0.379216	0.129946	0.0668362	0.120154	0.0103811	0.00613028
SCYL2	132	240	388	237	253	294	257.333		0.813317	0.841975	0.726908	0.586407	0.305368	0.0611148	0.0208818	0.0631808	0.00147824	0.000872569
ROCK1	144	499	166	507	78	151	257.5		0.867329	0.896153	0.812978	0.692522	0.443155	0.263042	0.193807	0.213945	0.0599914	0.0383634
CIT	290	400	155	401	163	137	257.667		0.831642	0.867123	0.763807	0.627777	0.353789	0.126111	0.0677673	0.108859	0.0100965	0.00568857
MAP3K15	184	408	76	362	360	161	258.5		0.83056	0.88159	0.781525	0.646562	0.37406	0.152553	0.0894585	0.128095	0.0157755	0.00904946
WNK4	109	413	400	126	409	102	259.833		0.83344	0.905065	0.812383	0.68185	0.415881	0.211349	0.141812	0.172396	0.0337448	0.020396
CLK4	436	139	49	234	315	388	260.167		0.82297	0.903343	0.806399	0.672107	0.400274	0.18529	0.117317	0.152508	0.0242014	0.0142637
FER	416	346	53	296	299	154	260.667		0.809148	0.902581	0.800413	0.661722	0.383173	0.156043	0.0908264	0.130915	0.0154679	0.00889504
MAST4	192	444	30	369	269		260.8		0.832382	0.916782	0.827377	0.703035	0.444748	0.222655	0.147498	0.188977	0.0365744	0.0226918
TP53RK	181	124	277	260	393	334	261.5		0.778149	0.898381	0.783765	0.636272	0.344845	0.0934138	0.0400712	0.0868619	0.00380821	0.00217392
PRKACB	368	432	494	15	49	216	262.333		0.834825	0.937596	0.855134	0.732883	0.479775	0.302008	0.228905	0.245561	0.0753087	0.0495596
MARK4	165	166	482	307		193	262.6		0.804028	0.926687	0.829547	0.697715	0.427029	0.181012	0.106628	0.158194	0.020249	0.0122219
TRAF1	111	202	493	370	387	14	262.833		0.821305	0.937768	0.850299	0.722605	0.460524	0.269393	0.195606	0.218317	0.05651	0.035977
FGFR1	212	348	310	187	350	170	262.833		0.753627	0.908915	0.78771	0.634696	0.335325	0.0724972	0.0252385	0.0729655	0.00167779	0.00100854
EPHB6	130	150	384	402		249	263		0.795511	0.92843	0.828547	0.694357	0.419838	0.165563	0.0923688	0.147156	0.0156928	0.00942264
MAPK10	149	276	377	82	347	353	264		0.770153	0.933797	0.825599	0.678905	0.387865	0.145684	0.0792608	0.12399	0.0113507	0.00649804
PBK	485	470	176	117	73		264.2		0.825268	0.953228	0.872096	0.753218	0.504682	0.311084	0.232999	0.259369	0.0773448	0.0514715
JAK1	197	262	216	365	330	217	264.5		0.726297	0.926181	0.798595	0.639474	0.331525	0.0578916	0.0159261	0.0636271	0.000718854	0.000477956
MARK1	123	476	417	330	144	99	264.833		0.792765	0.951274	0.857076	0.721504	0.446609	0.237728	0.162626	0.192733	0.0393705	0.0242139
LIMK2	370	22	415	270		251	265.6		0.78854	0.958162	0.864274	0.732424	0.462128	0.227087	0.146979	0.192784	0.0333765	0.0207034
CDK17	350	233	490	398	72	54	266.167		0.791508	0.965316	0.875066	0.742563	0.472138	0.27365	0.196738	0.221252	0.0542264	0.0344289
EPHA8	227	331	303	418	127	196	267		0.727617	0.963625	0.84692	0.690357	0.384708	0.122413	0.0578456	0.108438	0.00606718	0.00349
PRKCQ	62	196	435	332	343	235	267.167		0.748301	0.968946	0.862462	0.713801	0.418907	0.178682	0.105152	0.1482	0.0172814	0.0100926
GSG2	352	144		452	262	130	268		0.758713	0.979079	0.879575	0.740848	0.459736	0.207173	0.125296	0.178365	0.0239623	0.0146867
PAK1	378	261	241	407	161	160	268		0.71855	0.975185	0.858125	0.700001	0.391851	0.127698	0.0611645	0.112359	0.00649651	0.00374503
MAP2K7	314	428	288	259	190	131	268.333		0.713437	0.978828	0.860682	0.701308	0.391367	0.124667	0.0584943	0.110376	0.00594719	0.00343665
DYRK2	451	160	120	392	54	436	268.833		0.769733	0.98839	0.896988	0.761673	0.486222	0.284611	0.205073	0.229715	0.0560205	0.0357397
PIM3	415	285	187	397		62	269.2		0.756167	0.991004	0.894278	0.75702	0.478249	0.234911	0.150586	0.199066	0.03251	0.0202337
FES	28	266	129	489		435	269.4		0.786555	0.993942	0.91084	0.787237	0.530737	0.332672	0.250121	0.27651	0.0818032	0.0549114
Aldoa	332	242	242	474	81	250	270.167		0.71911	1	0.891103	0.73737	0.434257	0.186647	0.109325	0.154348	0.0172688	0.0101366
CAMKK2	494	336	44	279	298	175	271		0.732138	0.99203	0.907417	0.761041	0.468178	0.241673	0.160163	0.195449	0.0341089	0.0208438
PAK2	37	459	342	440	46	302	271		0.760776	0.993013	0.918234	0.784653	0.511465	0.317159	0.236026	0.256148	0.0702846	0.046011
ACVR2B	289	184	420	136	407	191	271.167		0.70278	0.989221	0.898238	0.740189	0.430743	0.173702	0.0967293	0.145218	0.0134873	0.00787061
STK38	117	39	279	383	441	373	272		0.731573	0.983053	0.919252	0.77515	0.485374	0.266412	0.183395	0.214645	0.0430354	0.0268264
RPS6KC1	272	288	217	92	276	489	272.333		0.699437	0.977332	0.912681	0.755833	0.447541	0.196045	0.115541	0.161419	0.0181211	0.0106974
DTYMK	254	464		318	205	122	272.6		0.713434	0.975802	0.919831	0.772596	0.47859	0.210872	0.123309	0.182042	0.020967	0.0129178
TAF1	330	356	123	379	246	202	272.667		0.66837	0.970765	0.906967	0.738691	0.415114	0.134615	0.0623726	0.118507	0.00582613	0.00341774
TBK1	274	322	238	390	321	93	273		0.667471	0.967162	0.91139	0.74339	0.419984	0.140838	0.0670226	0.122836	0.00656815	0.00384651
VRK3	185	227	341	382	326	181	273.667		0.646219	0.957098	0.91448	0.739729	0.40755	0.113061	0.0450427	0.104456	0.00311635	0.00188957
TRIB3	122	199	316	131	417	457	273.667		0.703187	0.965608	0.930251	0.778087	0.475902	0.239116	0.154637	0.193418	0.0302085	0.0183549
NEK10	334	421	427	287	76	109	275.667		0.693201	0.947405	0.950496	0.798993	0.497089	0.265373	0.178003	0.213459	0.0377923	0.0233842
PRKG2	278	330	136	409	194	309	276		0.635013	0.931445	0.943772	0.769034	0.435446	0.145115	0.0673167	0.126713	0.00599837	0.00355796
PLK4	189	274	337	22	363	472	276.167		0.693297	0.943561	0.955817	0.805605	0.505442	0.277751	0.189769	0.223073	0.0422948	0.0264183
KSR2	188	416	480	423	91	65	277.167		0.711756	0.94068	0.96825	0.828682	0.544579	0.343902	0.256814	0.276844	0.07476	0.0494096
AAK1	343	241	159	492	63	366	277.333		0.682411	0.932239	0.966296	0.814305	0.511136	0.280848	0.191396	0.225357	0.0419723	0.026228
TRIB2	423	101	413	443	111	176	277.833		0.688734	0.930311	0.971951	0.823962	0.526627	0.30687	0.217314	0.246005	0.053234	0.033978
PRKD1	422	64	59	495	364	266	278.333		0.702985	0.930794	0.977902	0.837435	0.551633	0.350293	0.262107	0.281866	0.0762982	0.0505674
TBCK		213	172	148	396	466	279		0.673082	0.91651	0.981723	0.831726	0.533187	0.274856	0.177435	0.230003	0.0358509	0.022747
TTK	297	318	227	265	208	362	279.5		0.561334	0.874684	0.980901	0.783501	0.420971	0.0840358	0.021186	0.0886848	0.000578793	0.000451044
Rpl11	397	130	174	227	266	492	281		0.634833	0.891103	1	0.836669	0.515819	0.263239	0.168688	0.21149	0.0301234	0.0184715
CDKL2	391	418	346	284	103	149	281.833		0.618367	0.878982	0.991618	0.840033	0.511848	0.248115	0.152545	0.200212	0.0241394	0.0146561
GSK3B	484	375	88	251	180	314	282		0.629965	0.882467	0.990344	0.846713	0.526017	0.276006	0.179995	0.221125	0.0334517	0.0206692
MAP2K2	463	358	170	469	102	133	282.5		0.655539	0.889288	0.98684	0.862515	0.559788	0.340083	0.245608	0.271923	0.0619996	0.0402824
RPS6KL1	392	158	307	337		220	282.8		0.595096	0.859527	0.980832	0.844931	0.51247	0.186587	0.0862436	0.169199	0.00781672	0.00509242
MATK	269	315	347	164	268	337	283.333		0.533519	0.828972	0.971052	0.827429	0.457064	0.114422	0.0362091	0.110246	0.00133962	0.000940217
EPHA1	237	264	376	188	320	318	283.833		0.529037	0.822701	0.964872	0.832739	0.46098	0.116889	0.0372934	0.112102	0.00138334	0.000970222
KIT	232	313	202	430		248	285		0.573687	0.833994	0.957078	0.864279	0.525663	0.192233	0.0875123	0.174105	0.00739669	0.00488846
PTK2	108	284	108	387	406	419	285.333		0.608273	0.852211	0.958825	0.877204	0.553763	0.30634	0.205818	0.244139	0.0405128	0.0254538
CDK18	233	105	383	410	340	246	286.167		0.562756	0.824405	0.945035	0.873164	0.524824	0.234622	0.132588	0.190883	0.0159959	0.00968849
CAMK2D	66	135	210	416	394	500	286.833		0.63015	0.854241	0.949978	0.899226	0.595063	0.3804	0.282369	0.304119	0.0759601	0.0505163
PRKY	168	308	323	353			288		0.579618	0.814112	0.930341	0.901059	0.582153	0.221483	0.0956456	0.213449	0.00790099	0.00595767
CLK1	403	248	248	219	256	355	288.167		0.49581	0.772198	0.912768	0.880001	0.499191	0.148702	0.0543442	0.134643	0.00236244	0.00159528
MELK	430	437	197	132	155	379	288.333		0.580743	0.821289	0.929559	0.902078	0.571178	0.31757	0.212425	0.252374	0.0401388	0.0252909
STK24	487	427	294	366	59	100	288.833		0.616633	0.837525	0.933069	0.915282	0.609252	0.39502	0.295154	0.315703	0.0802097	0.0537092
CDK4	267	440		178	403	157	289		0.580579	0.814518	0.923572	0.909946	0.586489	0.302638	0.188631	0.251608	0.0314158	0.0202009
TESK2	155	259	367	503	173	279	289.333		0.557238	0.802725	0.916376	0.907478	0.565201	0.294155	0.186211	0.234338	0.0295044	0.0182998
SHPK	466	179		348		165	289.5		0.61869	0.829772	0.927572	0.923639	0.631534	0.356541	0.236649	0.306207	0.0512214	0.0347377
NEK5	409	281	150	161	346	390	289.5		0.53369	0.787862	0.909361	0.904369	0.548376	0.252387	0.143825	0.203915	0.0169548	0.0103612
NEK4	372	147	259	193	397	372	290		0.520141	0.776615	0.901595	0.907262	0.544676	0.237194	0.128135	0.193391	0.013041	0.00797961
BUB1	477	366	42	357	196	305	290.5		0.576912	0.807881	0.912087	0.923373	0.597241	0.355723	0.249227	0.282151	0.0535836	0.03457
MAPK3	469	361	254	211	166	283	290.667		0.519947	0.772746	0.895824	0.914702	0.553886	0.251692	0.140886	0.203597	0.0155772	0.00954397
EPHA10	425	67		508		163	290.75		0.665897	0.850539	0.93075	0.942517	0.684166	0.483719	0.383153	0.409604	0.140324	0.101975
BRSK1	445	162	263	400	53	423	291		0.582314	0.808502	0.90985	0.929194	0.608247	0.375665	0.270059	0.298336	0.0630936	0.0413025
PSKH2	125	245	356	373	404	257	293.333		0.491535	0.739435	0.864963	0.939519	0.569356	0.256029	0.139635	0.207088	0.0138318	0.00854526
PIM1	335	28	491	30	392	484	293.333		0.628608	0.824259	0.907598	0.956253	0.674531	0.49699	0.403045	0.405403	0.146624	0.105956
FRK	384	173	374	368		172	294.2		0.521676	0.751201	0.867381	0.952455	0.609457	0.297074	0.170925	0.248616	0.0214846	0.0139843
STK38L		304	110	475	159	427	295		0.572321	0.781761	0.879569	0.964441	0.655139	0.413825	0.299354	0.337409	0.0735959	0.0497971
CSK	385	40	475	191		385	295.2		0.589131	0.791604	0.88403	0.967485	0.669556	0.447896	0.338537	0.366138	0.0968038	0.0670959
TRAD	255	466	104	408	233	311	296.167		0.504455	0.734958	0.848501	0.969587	0.616233	0.341237	0.221797	0.269148	0.0352832	0.0223124
ROR1	442	411	204	429	203	89	296.333		0.530861	0.752411	0.857429	0.9728	0.636881	0.390885	0.276257	0.308605	0.0581521	0.0379726
ATG5	221	327	326	455	293	162	297.333		0.455079	0.692809	0.819661	0.978512	0.59785	0.274431	0.148689	0.220552	0.0135307	0.0084713
BTK	377	329	380	140	90	469	297.5		0.521755	0.741309	0.84644	0.982791	0.644979	0.398183	0.281882	0.31408	0.0590561	0.0386535
MST4	139	250	333	447	260	361	298.333		0.455087	0.688359	0.812405	0.988603	0.611023	0.296447	0.168759	0.236024	0.0173811	0.010881
EPHA6	178	104	478	514	249	269	298.667		0.533516	0.744743	0.844043	0.993142	0.666997	0.43947	0.326454	0.348471	0.0809417	0.0545479
Cpne1	467	493	251	324	65	197	299.5		0.52747	0.73737	0.836669	1	0.672809	0.445107	0.331123	0.352815	0.0820249	0.0553799
MYLK	295	65	479	166	332	462	299.833		0.52399	0.733673	0.833263	0.997248	0.674451	0.445701	0.331057	0.353098	0.0813087	0.0548602
PKDCC	211	204	292	438	265	402	302		0.415978	0.640362	0.767407	0.975012	0.634032	0.302376	0.164775	0.240592	0.0139961	0.00890011
ACVR1B	465	334	278	328	197	214	302.667		0.410772	0.633154	0.760087	0.968332	0.639475	0.307089	0.167744	0.243938	0.0141664	0.00902721
MAPK7	302	38	375	311	388	410	304		0.458941	0.669217	0.778199	0.959857	0.683866	0.420211	0.290727	0.328813	0.0524592	0.034292
PLK1	319	328	118	354	267	444	305		0.409723	0.623629	0.744746	0.946656	0.668169	0.355844	0.213705	0.278575	0.0232555	0.0148303
AMHR2	148	66	428	472	385	332	305.167		0.487704	0.688058	0.786939	0.953187	0.713406	0.485774	0.365406	0.384291	0.0903954	0.0618437
HIPK2	402	387	308	323	212	204	306		0.36839	0.581095	0.712761	0.932748	0.657904	0.298055	0.147189	0.238631	0.00858553	0.00569625
FLT1	276	430	134	356	149	493	306.333		0.457518	0.660138	0.764619	0.940845	0.710064	0.461868	0.333409	0.362221	0.0690693	0.0461654
RPS6KA1	480	102	133	404	278	445	307		0.475413	0.672502	0.771085	0.938026	0.726939	0.499856	0.377536	0.395261	0.0935582	0.0643012
EIF2AK1	308	156	371	367	380	262	307.333		0.363121	0.571367	0.701016	0.919602	0.671919	0.317829	0.16346	0.252091	0.010415	0.00686456
MYLK3	446	56	320	471	146	405	307.333		0.484827	0.678938	0.774588	0.936848	0.735428	0.518513	0.399459	0.412121	0.107459	0.0749532
MAP2K5	82	267	220	481	351	448	308.167		0.449365	0.647541	0.750517	0.925618	0.726363	0.482895	0.35345	0.378945	0.076034	0.051309
UHMK1		462		153	295	324	308.5		0.47482	0.655339	0.758584	0.928644	0.751214	0.463684	0.309334	0.387947	0.0543753	0.0384953
INSRR	452	251	436	294	199	223	309.167		0.382322	0.584359	0.703411	0.906605	0.704236	0.394476	0.243598	0.306304	0.0271382	0.0175124
TTBK1	143	419	444	346		198	310		0.439557	0.627904	0.733193	0.911162	0.745413	0.474724	0.32999	0.380869	0.060462	0.041258
TSSK6	153	442	440	232	279	315	310.167		0.384164	0.583076	0.699257	0.898649	0.716962	0.418379	0.268293	0.324148	0.0336702	0.0218397
STK17B	324	224	319	235	358	411	311.833		0.313492	0.505007	0.63799	0.869148	0.703267	0.31799	0.144879	0.253711	0.00561701	0.00402686
PIM2	322	382	270	297	304	297	312		0.278929	0.463674	0.607698	0.859077	0.68874	0.237852	0.0644788	0.206945	0.000547421	0.000646672
GSK3A	333	341	359	299	220	320	312		0.288255	0.475106	0.615904	0.861437	0.693265	0.262113	0.0865841	0.220408	0.00129348	0.00121106
RPS6KB2	203	239	352	339	367	375	312.5		0.310487	0.49981	0.631865	0.862473	0.710139	0.327328	0.152033	0.259911	0.00612054	0.00436277
MYLK2	418	372	158	450	359	123	313.333		0.399233	0.588225	0.693758	0.877469	0.759599	0.503058	0.361172	0.391521	0.0677507	0.0455592
NEK1	127		152	490		485	313.5		0.524574	0.685678	0.767527	0.906375	0.81802	0.626619	0.510476	0.525471	0.18288	0.138361
JAK3	414	206	282	220		454	315.2		0.380198	0.557653	0.668427	0.860522	0.775512	0.477006	0.310598	0.380132	0.0411539	0.0282539
TPD52L3	470	121	299	456	416	132	315.667		0.415803	0.597296	0.694691	0.865454	0.790907	0.565303	0.432803	0.445638	0.105461	0.073751
SYK	351	194	261	327	429	336	316.333		0.296429	0.474105	0.600105	0.825721	0.750626	0.387717	0.202659	0.300403	0.0106808	0.0073645
SIK1	464	429	412	186		91	316.4		0.444519	0.616085	0.708688	0.869509	0.811355	0.59333	0.461961	0.479711	0.126245	0.091061
MAST2	304	303	283	505		192	317.4		0.36889	0.540988	0.650228	0.84184	0.794345	0.502023	0.333108	0.398604	0.0456507	0.0315112
TEK	455	234	397	268	105	452	318.5		0.370542	0.547741	0.650355	0.833228	0.803206	0.554916	0.407895	0.431583	0.079766	0.0545814
PTK6	361	367	300	435	158	292	318.833		0.300289	0.472854	0.59174	0.807159	0.781422	0.451764	0.269435	0.345337	0.0215992	0.0144314
DCLK3	128	431	272	261	414	407	318.833		0.33713	0.513081	0.62282	0.819933	0.794861	0.513666	0.351239	0.394619	0.0494457	0.0329985
WEE1	389	376	291	371	225	270	320.333		0.257492	0.418448	0.544991	0.77911	0.783162	0.39759	0.189915	0.307394	0.00631357	0.00475114
IGF1R	107	170	403	419	447	377	320.5		0.365506	0.538197	0.638386	0.818325	0.821976	0.582528	0.436358	0.454314	0.0910721	0.0630864
CDK5	373	41	455	413	297	351	321.667		0.364232	0.534375	0.632853	0.810414	0.833252	0.600252	0.455421	0.469373	0.0998207	0.0697539
TEC	199	398	286	255	337	459	322.333		0.282069	0.444488	0.560064	0.773968	0.814696	0.49395	0.304414	0.375088	0.0255507	0.0172041
STK19	398	209	474	50	302	501	322.333		0.398089	0.565572	0.656158	0.818574	0.849584	0.647454	0.518026	0.51647	0.147975	0.107711
MAP3K3	495	208	364	264	148	458	322.833		0.34448	0.51195	0.612593	0.795612	0.839026	0.595723	0.443508	0.462727	0.0872567	0.060385
NEK11	374		405	329	361	147	323.2		0.319962	0.476217	0.586173	0.785732	0.838317	0.536384	0.346584	0.421805	0.0378517	0.0267164
MAST1	336	337	389	427	410	45	324		0.341937	0.506938	0.606126	0.787264	0.849928	0.612121	0.460733	0.476387	0.0943248	0.0657443
NEK2	315	423	311	431	376	90	324.333		0.315351	0.478133	0.582262	0.774189	0.846022	0.584518	0.419533	0.449307	0.0674755	0.0460545
RIOK1	381	469	266	289	184	360	324.833		0.274306	0.430607	0.542678	0.752804	0.839895	0.533012	0.342357	0.403618	0.0323553	0.0218531
GRK5	393		453	196	450	135	325.4		0.370474	0.526508	0.621123	0.792108	0.872264	0.646624	0.497189	0.516746	0.116572	0.0841997
CHEK2	468	246	410	94	300	441	326.5		0.329397	0.488984	0.586558	0.766712	0.871178	0.638505	0.485435	0.497239	0.101368	0.0712324
GRK1	417	186	385	498	151		327.4		0.362326	0.514591	0.607807	0.777589	0.888349	0.668725	0.519431	0.534827	0.125243	0.0911272
SGK1	110	484	492	396	366	120	328		0.367485	0.524943	0.613215	0.774817	0.893306	0.698365	0.56584	0.558228	0.164866	0.121795
DYRK3	458	279	425	79	362	365	328		0.312439	0.468095	0.566501	0.75004	0.881888	0.643903	0.484663	0.498995	0.0940131	0.0657863
SGK223	250	292	379	285		434	328		0.264645	0.402174	0.515658	0.729798	0.873565	0.537854	0.307693	0.41974	0.0171741	0.013309
LIMK1		326		406	134	446	328		0.376111	0.51849	0.612837	0.782661	0.898193	0.665685	0.501312	0.542507	0.107951	0.0801215
RPS6KA5	400	393	361	74	264	479	328.5		0.319434	0.474739	0.571023	0.750362	0.888152	0.659631	0.505279	0.513984	0.107028	0.0756845
CLK3	441	357	289	304	133	453	329.5		0.27614	0.424716	0.527527	0.72312	0.889165	0.62594	0.447157	0.477423	0.0640868	0.0440474
STK39	291	412	487	322	177	290	329.833		0.259721	0.404715	0.510086	0.71243	0.889263	0.60985	0.419528	0.461549	0.0490372	0.0335437
STK40		256	470	414	389	121	330		0.33442	0.480766	0.57558	0.750979	0.906158	0.679199	0.519592	0.53929	0.111696	0.0808957
FGFR3	353	132	336	412		417	330		0.301699	0.444166	0.545604	0.735482	0.900504	0.639928	0.456068	0.500863	0.0676915	0.0482757
TSSK4	183	187	488	449	377	299	330.5		0.289323	0.438197	0.536846	0.723864	0.901538	0.659268	0.491708	0.507952	0.0873416	0.0610082
SGK494	275	280	426	372	323	317	332.167		0.188289	0.30775	0.42205	0.654669	0.900507	0.530326	0.266016	0.393962	0.0060108	0.00508084
MAPK8	459	425	486	58	223	343	332.333		0.333778	0.48327	0.571463	0.736218	0.925413	0.729385	0.589812	0.580353	0.163007	0.120444
LRRK2		300	345	238	402	382	333.4		0.228964	0.349027	0.459334	0.676125	0.921988	0.590961	0.333393	0.454667	0.0136622	0.0114528
CDC42BPG	263	480	392	239	354	273	333.5		0.22146	0.351518	0.457169	0.667282	0.920466	0.625457	0.410331	0.467106	0.0338036	0.0235321
FGFR4	478	168	431	249		342	333.6		0.298452	0.435279	0.531456	0.713635	0.932882	0.698168	0.523507	0.548937	0.0951128	0.0687718
PRKD3	395	473	409	169	70	491	334.5		0.336408	0.482497	0.567454	0.726618	0.944112	0.760078	0.625749	0.610111	0.188994	0.142245
DAPK3	288	420	22	351	419	507	334.5		0.331087	0.476981	0.562775	0.723853	0.943548	0.756282	0.619574	0.605212	0.181471	0.1359
CAMK1D	383	355	354	222	308	386	334.667		0.18137	0.295252	0.405447	0.633167	0.927131	0.577182	0.31102	0.425115	0.00863078	0.00699606
MAP3K8	222	296	446	466		244	334.8		0.275308	0.406457	0.505076	0.694572	0.941029	0.692098	0.501609	0.539154	0.0734269	0.0530152
MAP3K9	177	489	206	516		286	334.8		0.334823	0.47398	0.561847	0.72628	0.947077	0.75049	0.603569	0.60332	0.161753	0.120969
ROCK2	489	151		461		240	335.25		0.371366	0.503328	0.588418	0.744986	0.95473	0.767653	0.623409	0.631251	0.182254	0.139986
SGK2	371	181	437	445	237	341	335.333		0.232335	0.363102	0.463649	0.663028	0.940457	0.676409	0.478372	0.510223	0.056951	0.0395636
IRAK1	285	392	309	174	372	481	335.5		0.2288	0.358416	0.459258	0.659812	0.941719	0.675002	0.474148	0.508231	0.0540272	0.0375395
MAP3K4	474	211	395	271	239	430	336.667		0.230733	0.359392	0.457974	0.654308	0.953365	0.698703	0.503501	0.528406	0.0647963	0.0452349
RPS6KA3	449	195	122	417	348	490	336.833		0.28544	0.424127	0.513946	0.686922	0.959367	0.753763	0.598632	0.59146	0.140328	0.102321
YES1	482	424	171	343	250	352	337		0.233472	0.362409	0.460023	0.654192	0.956817	0.707736	0.516082	0.536762	0.0707976	0.0495546
CAMKK1	375	167	297	257	430	498	337.333		0.242922	0.373661	0.469291	0.658401	0.960717	0.72349	0.540839	0.552859	0.0858547	0.0605366
AXL	450	422	452	361	209	134	338		0.261227	0.394711	0.486572	0.666332	0.968063	0.751121	0.583787	0.58248	0.117107	0.0841817
EIF2AK2	448	426	464	138	371	184	338.5		0.268896	0.402975	0.492993	0.668493	0.972928	0.764837	0.603757	0.597191	0.132881	0.0965396
CDC42BPA	394	273	430	190	270	480	339.5		0.220608	0.34318	0.438755	0.63177	0.979871	0.737346	0.542162	0.558459	0.0737477	0.0519508
NEK6	270	312	244	342	405	467	340		0.182862	0.292335	0.392267	0.601498	0.983404	0.700511	0.46237	0.516589	0.0310615	0.0223596
Actb	493	494	484	155	131	293	341.667		0.300628	0.434257	0.515819	0.672809	1	0.82723	0.690301	0.666109	0.212499	0.162591
CDKL1	171	389	232	454	374	451	345.167		0.204849	0.316964	0.406241	0.590889	0.967977	0.816857	0.626617	0.623283	0.099162	0.0713048
CAMK2A	354	390	373	422	383	153	345.833		0.175865	0.277587	0.369011	0.56417	0.959809	0.804087	0.584074	0.599572	0.0601294	0.0430665
MAPKAPK2	346	454		145		440	346.25		0.294505	0.405344	0.490123	0.654964	0.966026	0.859577	0.69639	0.696308	0.170222	0.132061
GRK4	329	407	287	359	272	426	346.667		0.136873	0.220272	0.313613	0.524514	0.947967	0.775505	0.486824	0.55751	0.0156273	0.0127823
CSNK1A1L	323	465	196	428	305	370	347.833		0.167333	0.264159	0.353465	0.546718	0.940404	0.83195	0.609901	0.61978	0.0624522	0.0449969
LATS2	462	456	119	437	236	378	348		0.225945	0.340733	0.424009	0.593713	0.945667	0.87041	0.706111	0.682392	0.161663	0.120407
SLK	160	324	234	484	443	460	350.833		0.204979	0.311875	0.39388	0.564705	0.919878	0.899437	0.728137	0.701288	0.155067	0.115373
PRKCD	317	325	362	491	230	383	351.333		0.144368	0.228967	0.314955	0.508173	0.904514	0.876385	0.637371	0.645593	0.0518966	0.0381739
PXK		164	317	518	412	346	351.4		0.224548	0.327231	0.41025	0.580986	0.919585	0.907121	0.733259	0.715329	0.15462	0.117354
NEK7	359		344	504	89	464	352		0.263635	0.374264	0.452081	0.607488	0.921145	0.926477	0.782023	0.751731	0.235041	0.184204
ABL2	341	409	483	501	257	127	353		0.210548	0.316975	0.395996	0.560074	0.90372	0.929206	0.768306	0.733571	0.188211	0.142679
MLKL	360	406	360	314	283	395	353		0.106685	0.170224	0.254601	0.459424	0.879406	0.878205	0.55122	0.617892	0.00910895	0.00899597
ACVR1	362	448	305	499	154		353.6		0.221597	0.321824	0.402597	0.569609	0.902527	0.934773	0.766375	0.740888	0.173753	0.133079
STK32A	261	491	433	394	118	431	354.667		0.198947	0.300946	0.379113	0.543502	0.888438	0.947239	0.782996	0.745776	0.185153	0.140302
AATK		88	451	480		404	355.75		0.300634	0.404615	0.478252	0.623023	0.904147	0.968332	0.838292	0.806143	0.299452	0.243733
ANKK1	388	399	414	380	428	129	356.333		0.158435	0.246018	0.324991	0.499587	0.864814	0.961554	0.767404	0.73495	0.123215	0.0911551
BRAF	209	402	328	338	432	438	357.833		0.124688	0.196623	0.274814	0.457938	0.841137	0.978878	0.745169	0.723513	0.0663432	0.049555
DCLK2	420	377	285	254		456	358.4		0.15252	0.225966	0.306879	0.489335	0.848549	0.98844	0.762272	0.747219	0.0756543	0.0594011
Ldha	325	463	457	281	273	356	359.167		0.118423	0.186647	0.263239	0.445107	0.82723	1	0.763345	0.737204	0.0641616	0.0483059
CAMK2G	257	235	450	436		418	359.2		0.167228	0.246466	0.325573	0.50031	0.847036	0.999543	0.801203	0.771322	0.118933	0.0914454
STK10	421	258	439	97	446	496	359.5		0.199571	0.297927	0.371087	0.525338	0.852862	0.996337	0.853099	0.804602	0.24056	0.187759
ULK2	156	278	432	483	451		360		0.203796	0.294806	0.370351	0.530259	0.852361	0.990426	0.849153	0.806619	0.212255	0.165855
MAP3K13	438	359	284	506		225	362.4		0.166674	0.244263	0.319889	0.48752	0.823179	0.957738	0.858198	0.813141	0.15477	0.119838
IKBKB	399	229	306	502	391	357	364		0.113778	0.177928	0.249097	0.420159	0.78504	0.926213	0.859355	0.805268	0.0980072	0.073844
PRKCE	427	455	398	288	411	206	364.167		0.117213	0.183014	0.2541	0.423678	0.785504	0.925435	0.866196	0.810441	0.108782	0.0818558
OXSR1			448	301	214	497	365		0.210967	0.289769	0.364514	0.523545	0.824543	0.932793	0.907853	0.859841	0.220263	0.177567
BRD3		492	343	352	284	381	370.4		0.111653	0.162597	0.230902	0.39899	0.738867	0.823186	0.966603	0.886506	0.0888221	0.0732381
PLK3	309	282	441	393		432	371.4		0.106308	0.154347	0.221461	0.388885	0.728224	0.803506	0.985028	0.89767	0.08162	0.0685359
DYRK1A	356	369	218	487	313	486	371.5		0.106295	0.164392	0.228114	0.384019	0.723514	0.825179	0.989378	0.904316	0.160492	0.123284
Arhgdia	431	395	390	308	421	288	372.167		0.0711319	0.109325	0.168688	0.331123	0.690301	0.763345	1	0.895751	0.0470489	0.0401268
ERN1	364	271	330	457		442	372.8		0.106843	0.155007	0.220847	0.384885	0.718645	0.787615	0.988124	0.917159	0.100227	0.0825958
GRK7	428	243		486	281	433	374.2		0.126214	0.183401	0.248618	0.404072	0.72198	0.798001	0.968772	0.941129	0.18841	0.150048
MINK1	301	438	370	316		449	374.8		0.096028	0.138282	0.201609	0.364185	0.696757	0.745386	0.946914	0.940572	0.0823766	0.0708037
PTK2B	456	189	340	479		412	375.2		0.134089	0.194382	0.258831	0.410131	0.72054	0.796736	0.956696	0.954525	0.227914	0.182348
IRAK4	147		322	511	413	488	376.2		0.164363	0.235359	0.298662	0.440189	0.732512	0.814916	0.952262	0.969399	0.325539	0.266914
MAP4K4		453	301	488	137	505	376.8		0.172457	0.245716	0.308342	0.446831	0.73361	0.815993	0.94768	0.976044	0.352348	0.291429
PSK	419	219		426	352	473	377.8		0.111556	0.161359	0.223137	0.375225	0.688527	0.742176	0.909391	0.981926	0.185651	0.149326
MKNK1	483		253	512	379	264	378.2		0.129717	0.187437	0.249431	0.396185	0.699044	0.76379	0.915754	0.987676	0.255678	0.206383
Hnrnpd	498	458	348	470	201	301	379.333		0.100941	0.154348	0.21149	0.352815	0.666109	0.737204	0.895751	1	0.243937	0.193136
TAOK1	497	370	489	385	172	363	379.333		0.102479	0.156604	0.213856	0.354902	0.667424	0.739426	0.896847	1	0.249081	0.197485
RIOK3		500	378	384	318	335	383		0.0818754	0.116122	0.171386	0.319565	0.62954	0.627664	0.78963	0.952415	0.125267	0.106766
DCLK1	264	405	325	420		502	383.2		0.0946312	0.135556	0.192076	0.3374	0.640629	0.660166	0.81492	0.95324	0.193363	0.158011
NRBP2	433	216	459	378	328	495	384.833		0.0774868	0.118045	0.168944	0.303533	0.608292	0.643507	0.797943	0.932178	0.230229	0.183228
PRKCH	401	434	463	197	365	468	388		0.0718012	0.1089	0.156966	0.286393	0.582243	0.602794	0.748463	0.893163	0.250659	0.201138
STRADA	496	461		395	145	447	388.8		0.125547	0.179089	0.23359	0.363346	0.636164	0.674772	0.797745	0.905321	0.392274	0.329501
TNIK	437	338	462	321			389.5		0.101528	0.133414	0.190035	0.336548	0.617518	0.568367	0.685729	0.88042	0.176369	0.159159
BMX	460		318	451	238	482	389.8		0.0930805	0.132661	0.184606	0.318284	0.600747	0.605535	0.736319	0.880695	0.290284	0.239683
PRKCG	443	479	471	399		159	390.2		0.114789	0.16383	0.217041	0.346544	0.619517	0.647687	0.770901	0.888022	0.379299	0.31777
BMPR1B	363	306	339	517	444		393.8		0.0721768	0.101116	0.148019	0.277406	0.554813	0.516024	0.633755	0.822932	0.245169	0.205381
STK31	492	305	402	477	370	322	394.667		0.0476088	0.0703744	0.10949	0.227282	0.507288	0.464277	0.586632	0.793576	0.209183	0.171304
LATS1	348	268		465		503	396		0.110962	0.147207	0.200192	0.333565	0.592927	0.558673	0.661514	0.825126	0.353342	0.303072
PDIK1L	488	295	458	267		475	396.6		0.0811746	0.114555	0.16122	0.285309	0.551296	0.529566	0.64184	0.804675	0.345426	0.289611
EPHA7	499	488	327	462	258	354	398		0.0555982	0.0829455	0.122547	0.235784	0.502709	0.479973	0.596233	0.770547	0.322167	0.265054
PRPF4B	406	468	481	355	282		398.4		0.0636169	0.0880553	0.130948	0.253196	0.518657	0.455841	0.555441	0.765698	0.270412	0.228961
MAPKAPK3	248	451	429	473	395	399	399.167		0.0435641	0.063862	0.0997056	0.209747	0.474796	0.416987	0.522443	0.737446	0.25494	0.210243
STK17A	404	362	438	424		371	399.8		0.0442423	0.0579652	0.0951833	0.214231	0.479282	0.336896	0.38222	0.713764	0.0986737	0.107542
TAOK2				509	381	313	401		0.139143	0.170928	0.227409	0.365043	0.604626	0.525417	0.59574	0.791622	0.382683	0.343839
NEK9		391	264	510	439		401		0.0988957	0.129888	0.179178	0.306984	0.557192	0.499755	0.587849	0.771224	0.383712	0.3322
DYRK4	439		369	496	311	392	401.4		0.0539178	0.0732154	0.112497	0.229856	0.488154	0.394434	0.473948	0.719602	0.247292	0.21424
CDK13	226	482	331	515	399	471	404		0.0547881	0.0813617	0.118144	0.222798	0.471226	0.444116	0.545949	0.712897	0.417965	0.351603
TRPM6	321		476	476		350	405.75		0.0793914	0.101732	0.146453	0.269668	0.512797	0.410375	0.47222	0.705896	0.354095	0.312915
DAPK2	424	374	449	485	325	398	409.167		0.0262512	0.0361958	0.0617093	0.151905	0.382704	0.253417	0.296753	0.584019	0.247026	0.214806
HIPK3	390	472	408	364	420	403	409.5		0.0217484	0.0289293	0.0519938	0.139002	0.366774	0.206144	0.219778	0.556926	0.156375	0.152815
GRK6	473	302	406	513		374	413.6		0.0458522	0.0613791	0.0936608	0.193032	0.416927	0.308968	0.360395	0.594986	0.432752	0.374974
BRDT	408	487	357	478	309	443	413.667		0.0270403	0.0376534	0.0622716	0.147359	0.364791	0.249612	0.295829	0.549104	0.366247	0.312007
STYK1	434	301	401	460	425	483	417.333		0.0228458	0.0310973	0.0528057	0.131313	0.336103	0.205428	0.234048	0.498156	0.385275	0.331583
CDK20	457	496	418	213	422	508	419		0.03802	0.0550012	0.0822022	0.165795	0.372346	0.3073	0.372909	0.552836	0.578533	0.504248
CASK	292	490	422	468		424	419.2		0.0383231	0.0501897	0.0784203	0.169368	0.377925	0.25062	0.282153	0.529041	0.482996	0.42263
MARK2	486		416	349	437	415	420.6		0.0296184	0.037024	0.061674	0.147913	0.350451	0.184245	0.18262	0.480397	0.385176	0.34953
AURKC	280	447	372	519		499	423.4		0.0431186	0.0575874	0.0860332	0.173611	0.372992	0.271145	0.313405	0.519386	0.613744	0.542465
CSF1R		460	461	453	317	429	424		0.0299739	0.0377977	0.0617451	0.144433	0.338637	0.18488	0.190298	0.460494	0.493241	0.437484
FGFR2	500	319	456	521		327	424.6		0.0409582	0.0543892	0.0818923	0.167696	0.363897	0.256874	0.294772	0.504455	0.622978	0.551299
TLK2	481		302	467	375	506	426.2		0.03561	0.0464246	0.0718615	0.154455	0.345573	0.222238	0.248027	0.473851	0.615442	0.544248
FAS		446	368	464	390	470	427.6		0.0245283	0.0298208	0.0506379	0.12687	0.309677	0.138452	0.1247	0.407768	0.493068	0.445548
TAF1L	461		419	446	424	406	431.2		0.0198129	0.0230351	0.0408593	0.110504	0.281474	0.09656	0.0675988	0.354685	0.476311	0.448864
BRD2	479	323	447	482	438	455	437.333		0.0127661	0.0161005	0.0287634	0.0808416	0.226313	0.090624	0.0858728	0.300414	0.728131	0.640971
INSR		371	443	463	435	504	443.2		0.0173139	0.0200994	0.0348164	0.0927187	0.236545	0.0796902	0.0618535	0.282958	0.85063	0.757906
TSSK1B	396	478	421	520	427	437	446.5		0.00857592	0.0101003	0.019064	0.0598554	0.17921	0.0480426	0.0351361	0.21571	0.926214	0.815729
Gapdh	376	474	423	497		476	449.2		0.0151431	0.0172688	0.0301234	0.0820249	0.212499	0.0641616	0.0470489	0.243937	1	0.893485
Pgk1	454	477	469	494	335	494	453.833		0.00845997	0.0101366	0.0184715	0.0553799	0.162591	0.0483059	0.0401268	0.193136	0.893485	1
ERBB4	476	483		493		421	468.25		0.0178544	0.018284	0.0309175	0.0808655	0.191425	0.0401897	0.0197512	0.18055	0.527662	0.676122
